# Supplementary material for: New approaches to three-dimensional positive electrodes enabling scalable high areal capacity
Source: Royal Society of Chemistry journal article supplement (doi:10.1039/d3ta07139a), 2023-12-08
Supplement: d3ta07139a1.pdf [file d3ta07139a1.pdf]

## Supporting Information

### **New approaches to three-dimensional positive electrodes enabling scalable high areal capacity**

Zhiyong Zhao<sup>1</sup>, Xiaowei Zhang<sup>1,\*</sup>, Peng Wang<sup>1</sup>, Ioanna Maria Pateli<sup>2</sup>, Hongyi Gao<sup>3,4</sup>,  
Ge Wang<sup>3,\*</sup>, John T. S. Irvine<sup>1,2,\*</sup>

<sup>1</sup> *Institute of Advanced Materials, Beijing Normal University, Beijing, 100875, China*

<sup>2</sup> *School of Chemistry, University of St Andrews, Fife KY16 9ST, St Andrews, UK*

<sup>3</sup> *Beijing Advanced Innovation Center for Materials Genome Engineering, Beijing Key Laboratory of Function Materials for Molecule & Structure Construction, School of Materials Science and Engineering, University of Science and Technology Beijing, Beijing, 100083, China*

<sup>4</sup> *Shunde Innovation School, University of Science and Technology Beijing, Shunde 528399, P. R. China*

\* Correspondence should be addressed to [xiaoweizhang@bnu.edu.cn](mailto:xiaoweizhang@bnu.edu.cn),  
[gewang@ustb.edu.cn](mailto:gewang@ustb.edu.cn), and [jtsi@st-andrews.ac.uk](mailto:jtsi@st-andrews.ac.uk).

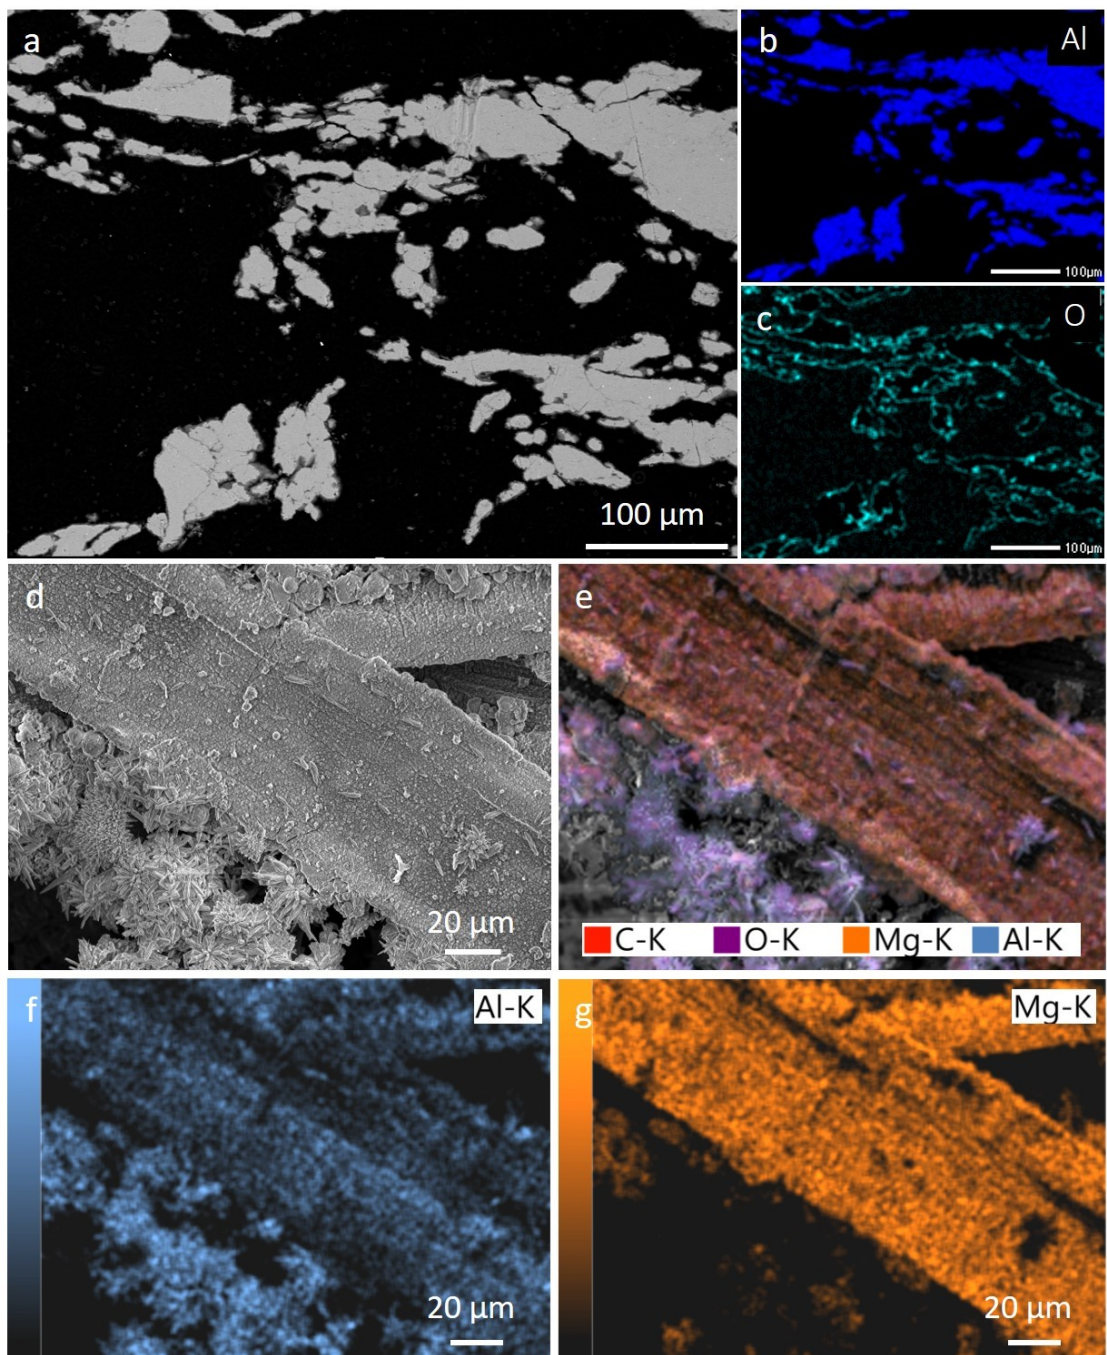

**Figure S1.** (a,d) Cross-section SEM image and (b,c,e,f,g) EDX elemental mapping images of the initial pAlN substrate before HCl treatment.

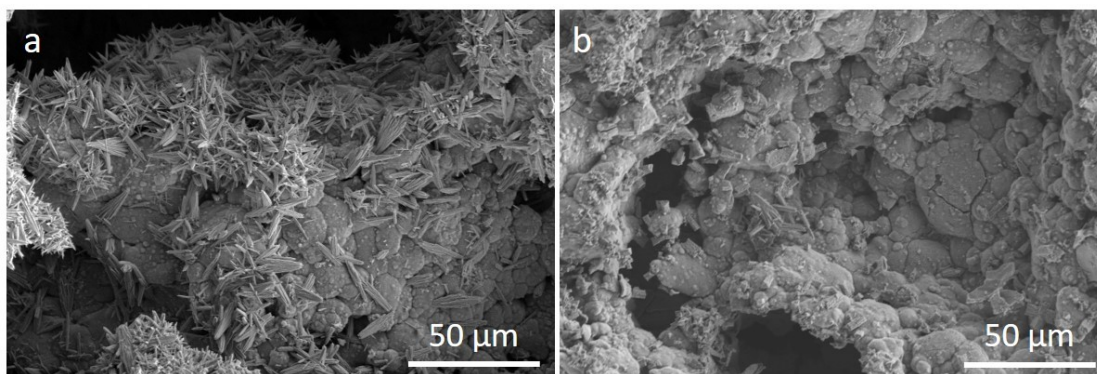

**Figure S2.** SEM images of the pAlN substrate (a) before and (b) after HCl treatment.

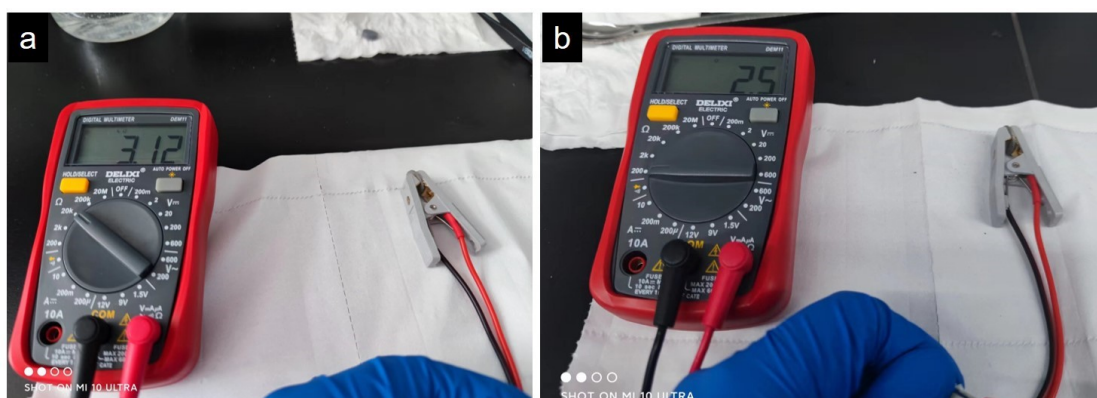

**Figure S3.** Resistance value of the pAlN substrate (a) before and (b) after HCl treatment.

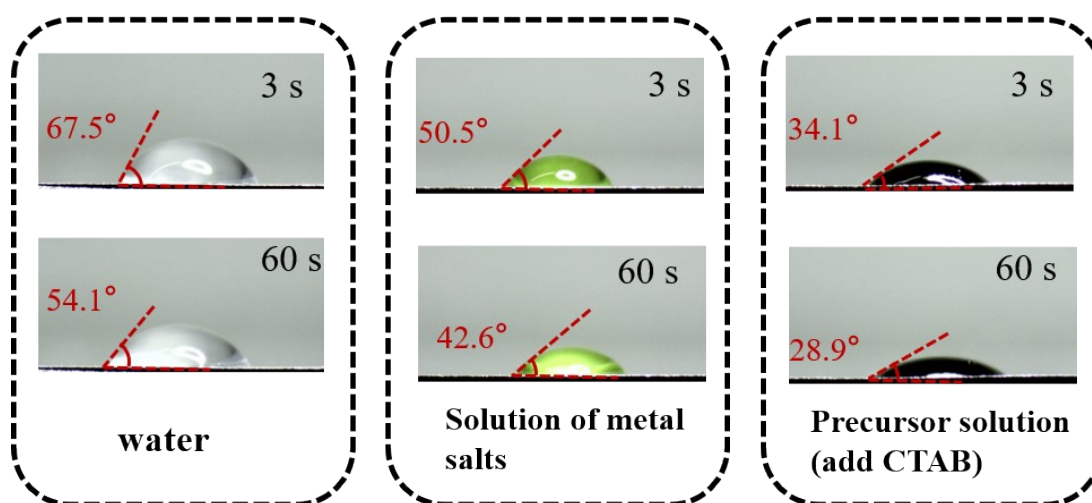

**Figure S4.** The wetting angles on Al foil using water, metal salt solution (mixture of  $\text{LiNO}_3$ ,  $\text{Fe}(\text{NO}_3)_3 \cdot 9\text{H}_2\text{O}$  and  $\text{NH}_4\text{H}_2\text{PO}_4$ ) and precursor solution (mixture of  $\text{LiNO}_3$ ,  $\text{Fe}(\text{NO}_3)_3 \cdot 9\text{H}_2\text{O}$ ,  $\text{NH}_4\text{H}_2\text{PO}_4$  and CTAB).

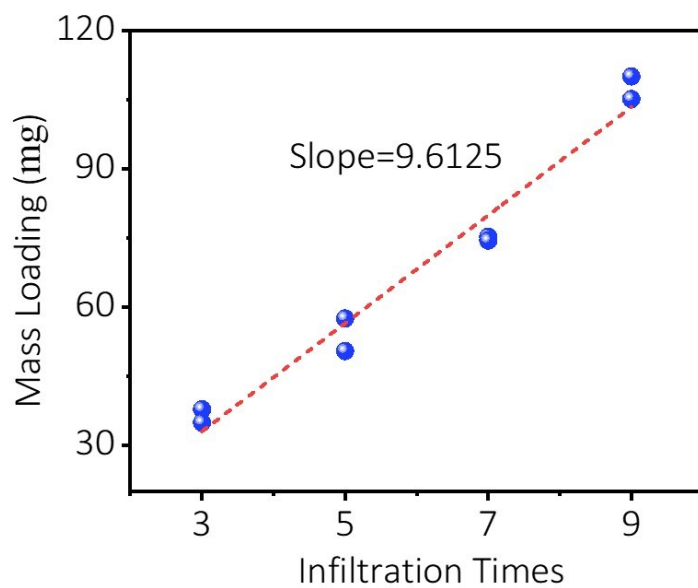

**Figure S5.** The relationship between the mass loading and the infiltration times.

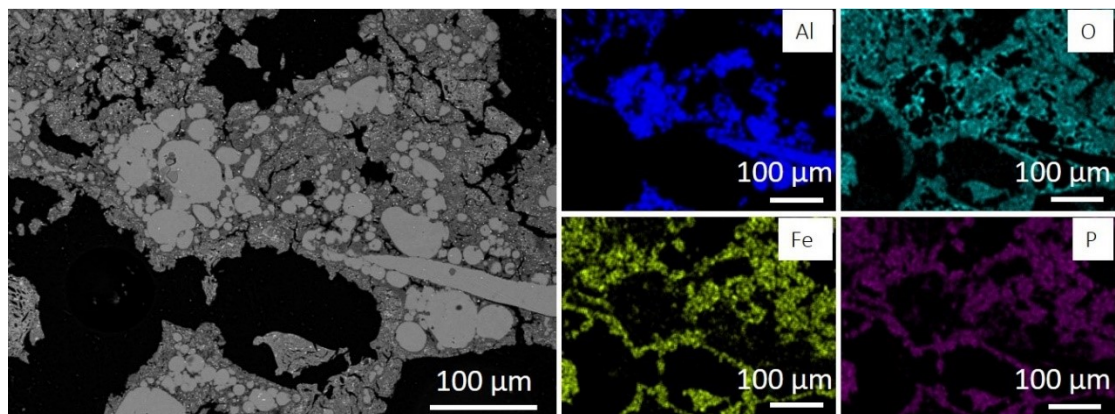

**Figure S6.** SEM image and EDX elemental mapping of the polished cross-section of the 3D LFP/pAlN electrode.

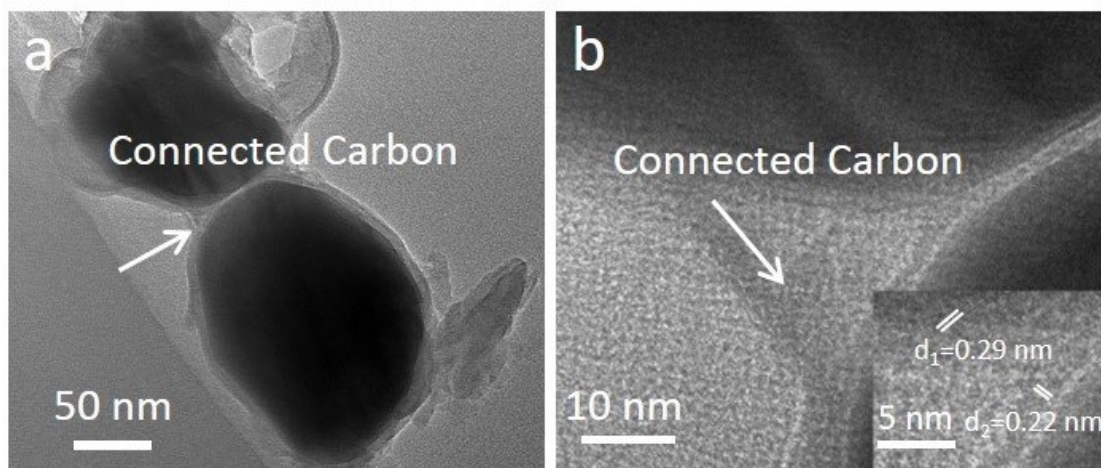

**Figure S7.** (a) TEM image and (b) HRTEM image of the nanoparticles ground from the 3D LFP/pAlN electrode.

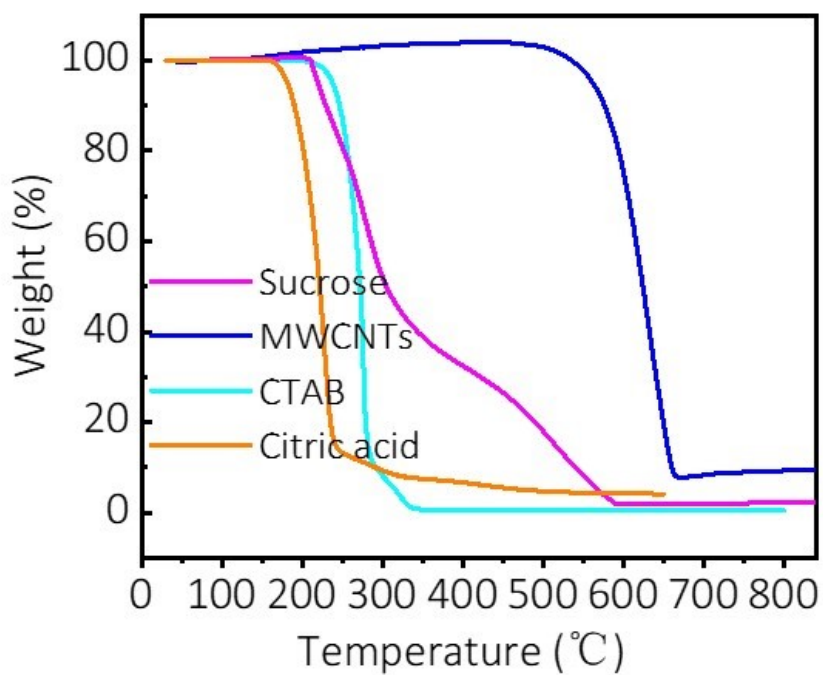

**Figure S8.** TGA curves of sucrose, MWCNTs, CTAB and citric acid measured under air atmosphere.

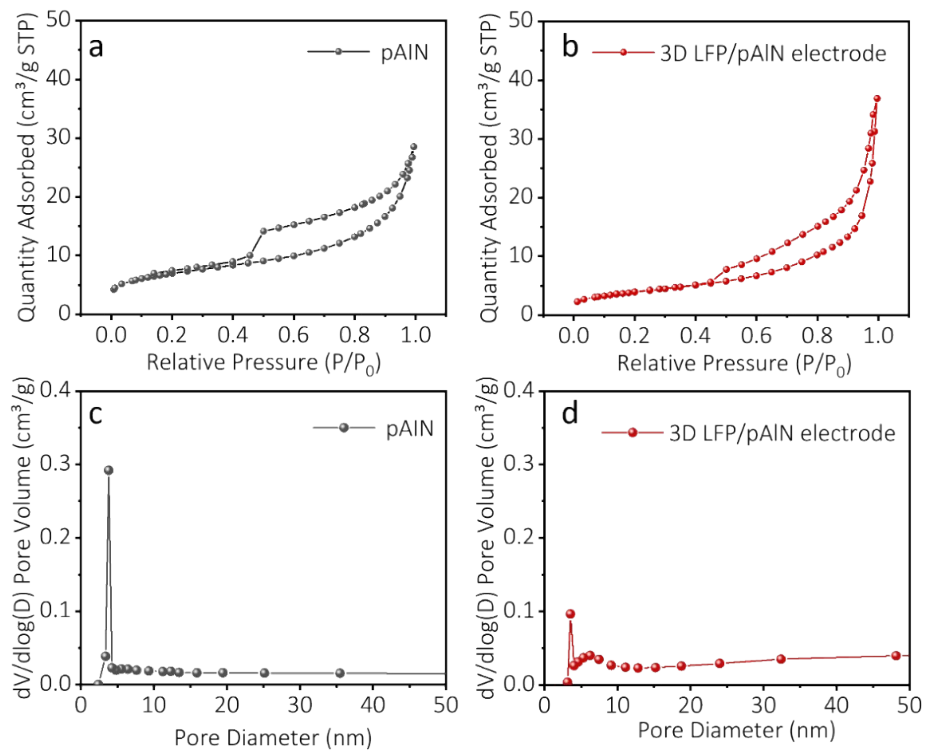

**Figure S9.** N<sub>2</sub> adsorption isotherms of (a) pAlN and (b) 3D LFP/pAlN electrode. Pore size distribution curves of (c) pAlN and (d) 3D LFP/pAlN electrode.

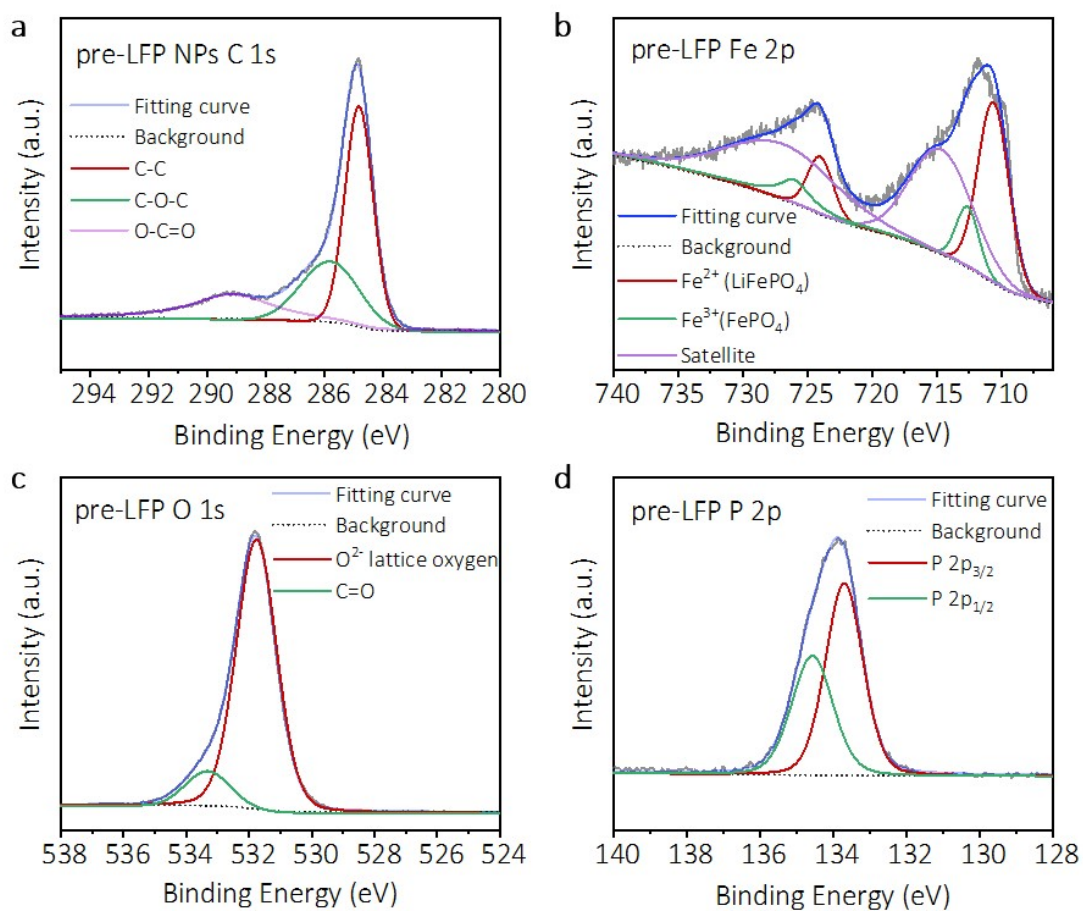

**Figure S10.** High-resolution XPS spectra of (a) C 1s, (b) Fe 2p, (c) O 1s and (d) P 2p for commercial carbon-coating pre-LFP NPs.

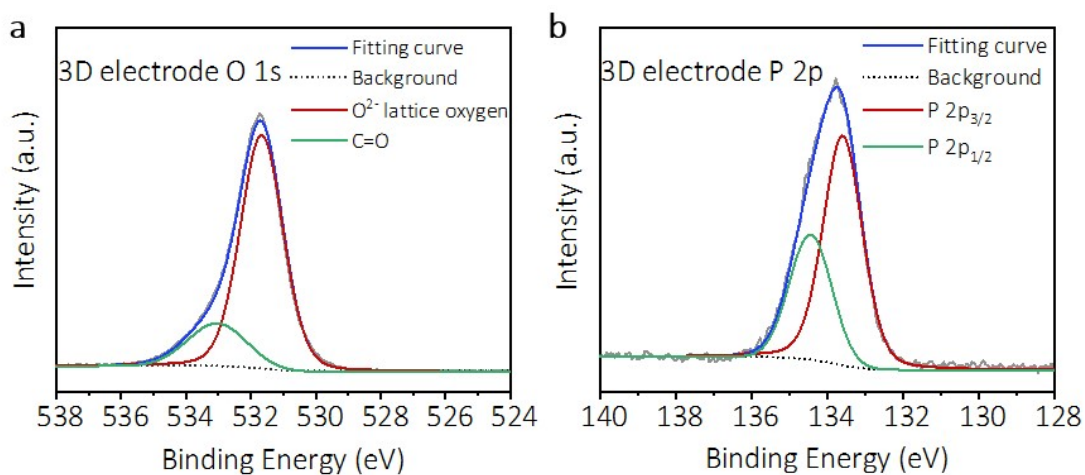

**Figure S11.** High-resolution XPS spectra of (a) O 1s and (b) P 2p for 3D LFP/pAlN electrode.

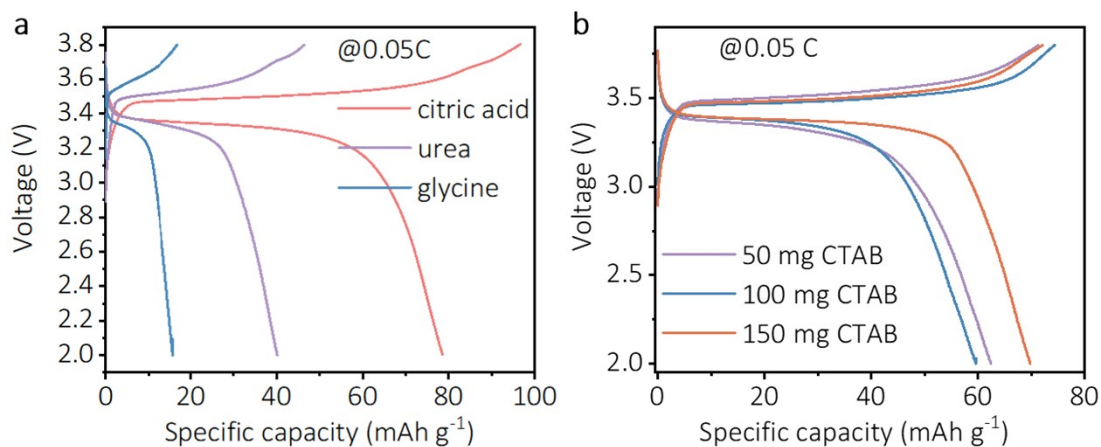

**Figure S12.** (a) Galvanostatic charge/discharge profiles of 3D LFP/pAlN electrode using different organic fuels (citric acid, urea and glycine) and (b) different amount of CTAB (50 mg, 100 mg, 150 mg).

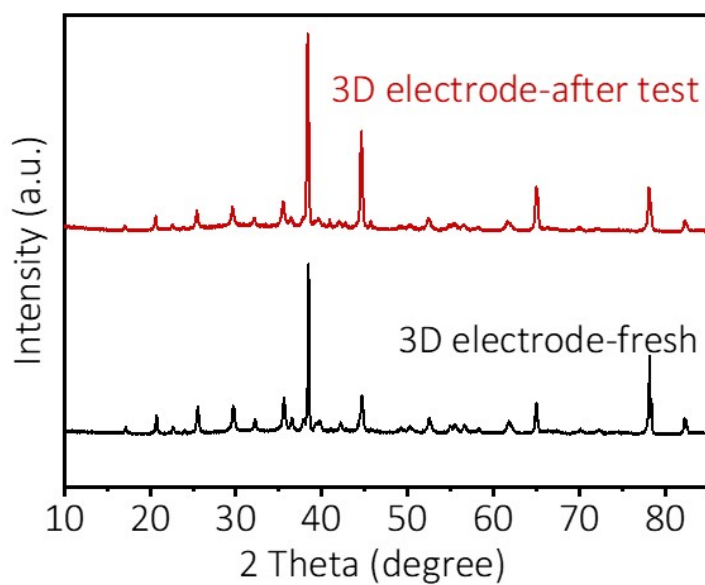

**Figure S13.** XRD curves of the 3D electrode powder before and after galvanostatic charge/discharge cycles.



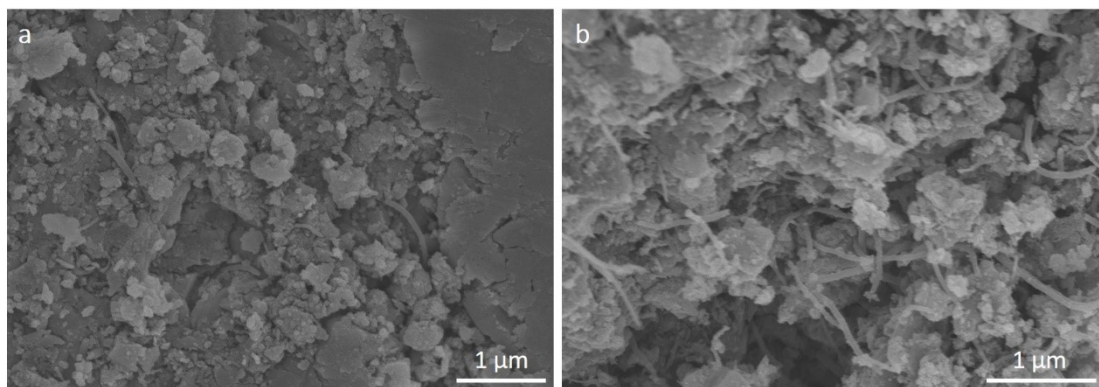

**Figure S14.** The SEM image of the 3D electrode after galvanostatic charge/discharge cycles.

**Table S1.** The calculation of porosity of Al foam.

| Resistance ( $\Omega$ ) | m (mg) | thickness (mm) | $\rho_f$ ( $\text{g}\cdot\text{cm}^{-3}$ ) | Porosity |
|-------------------------|--------|----------------|--------------------------------------------|----------|
| 7.8                     | 66.1   | 0.869          | 0.49                                       | 81.7     |
| 12                      | 72.3   | 0.944          | 0.50                                       | 81.6     |
| 28                      | 83.1   | 0.898          | 0.60                                       | 77.7     |
| 8                       | 76.1   | 0.934          | 0.53                                       | 80.4     |
| 2.7                     | 80.2   | 0.958          | 0.54                                       | 79.9     |
| 4.6                     | 85.1   | 0.933          | 0.59                                       | 78.1     |
| 3.1                     | 83.3   | 0.962          | 0.56                                       | 79.2     |
| 2.5                     | 79.4   | 0.949          | 0.54                                       | 79.9     |
| 5.8                     | 84.9   | 0.923          | 0.60                                       | 77.9     |
| 4.2                     | 82.3   | 0.969          | 0.55                                       | 79.6     |
| 4                       | 77.2   | 0.96           | 0.52                                       | 80.7     |
| 3.1                     | 70.6   | 0.953          | 0.48                                       | 82.2     |

The porosity is calculated by:

$$\text{Porosity} = 1 - \rho_f / \rho_{Al}$$

The average porosity of Al foam is 79.9.

**Table S2.** The BET surface areas of pAlN and 3D LFP/pAlN electrode.

| Sample                | $S_{\text{BET}}$ ( $\text{m}^2\text{g}^{-1}$ ) |
|-----------------------|------------------------------------------------|
| pAlN                  | 24.37                                          |
| 3D LFP/pAlN electrode | 14.20                                          |

**Table S3.** Performance comparison of 3D LFP/pAlN electrode with recently reported novel structure 3D electrodes using non-situ growth methods.

| Electrode structure                                                                                                       | Mass loading<br>(mg cm <sup>-2</sup> ) | Cycles     | Areal capacity<br>(mAh cm <sup>-2</sup> ) | Ref.             |
|---------------------------------------------------------------------------------------------------------------------------|----------------------------------------|------------|-------------------------------------------|------------------|
| <b>3D LFP/pAlN electrode</b>                                                                                              | <b>65</b>                              | <b>100</b> | <b>6.56</b>                               | <b>This work</b> |
| Magnetically aligned Fe <sub>3</sub> O <sub>4</sub> -modified graphite flakes                                             | 9.1                                    | 50         | 0.93                                      | 1                |
| LiFePO <sub>4</sub> slurry in wood-templating                                                                             | 60<br>(LiFePO <sub>4</sub> )           | 140        | 3.8                                       | 2                |
| Copolymer-aligned structure of NMC811 secondary particle                                                                  | 50                                     | 50         | 8.84                                      | 3                |
| LiFe <sub>0.7</sub> Mn <sub>0.3</sub> PO <sub>4</sub> nanoplates on 3D graphene frameworks with aligned vertical channels | 21.2                                   | 500        | 1.77                                      | 4                |
| Electrophoretic deposition of LiFePO <sub>4</sub> onto 3D carbon fiber cloth                                              | 20<br>(LiFePO <sub>4</sub> )           | 100        | 2                                         | 5                |
| Micrometer-size bulk-porous Si/carbonized polyacrylonitrile composites                                                    | 1.6                                    | 50         | 3                                         | 6                |
| Thick porous LiFePO <sub>4</sub> /C composite electrodes by spark plasma sintering                                        | ≈150                                   | 20         | 21                                        | 7                |
| Freestanding Li <sub>4</sub> Ti <sub>5</sub> O <sub>12</sub> /Super P/PVDF electrode                                      | 14                                     | 100        | 1.95                                      | 8                |

**Table S4.** Performance comparison of 3D LFP/pAlN electrode with recently reported porous and conductive 3D electrodes using in situ grown methods.

| Electrode structure                                                                                                   | Mass loading<br>(mg·cm <sup>-2</sup> ) | Cycles     | Areal capacity<br>(mAh·cm <sup>-2</sup> ) | Ref.             |
|-----------------------------------------------------------------------------------------------------------------------|----------------------------------------|------------|-------------------------------------------|------------------|
| <b>3D LFP/pAlN electrode</b>                                                                                          | <b>65</b>                              | <b>100</b> | <b>6.56</b>                               | <b>This work</b> |
| <b>3-D nanoporous network composed of NiCuMn@oxide core@shell structures supported by an intercalary Cu film</b>      | 6.9 (NiCuMn oxide)                     | 100        | 6.1                                       | 9                |
| <b>FeOx porous nanoblocks array on Cu foam</b>                                                                        | 2.5 (FeOx)                             | 50         | 3.33                                      | 10               |
| <b>Outer few-layer NiO nanoflowers@medial NiO layer@Ni foam</b>                                                       | -                                      | 100        | 1.45                                      | 11               |
| <b>Thick mesoporous Co<sub>3</sub>O<sub>4</sub> nanosheet on Ni foam</b>                                              | 4.15 (Co <sub>3</sub> O <sub>4</sub> ) | 30         | 4.39                                      | 12               |
| <b>Carbon-encapsulated Fe<sub>3</sub>O<sub>4</sub> nanospheres anchored on CNT network</b>                            | 0.8                                    | 500        | 0.32                                      | 13               |
| <b>LiMn<sub>2</sub>O<sub>4</sub>@C grown on CNT</b>                                                                   | 2                                      | 1000       | 0.11                                      | 14               |
| <b>LiMn<sub>2</sub>O<sub>4</sub>@C grown on carbon nanofiber</b>                                                      | 2                                      | 1000       | 0.18                                      | 14               |
| <b>Carbon fiber cloth coated with exfoliated porous N-doped carbon fiber, NiO nanosheets, and carbon quantum dots</b> | 10.58                                  | 250        | 2.91                                      | 15               |
| <b>MoS<sub>2</sub> nanoflakes grown on the twine carbon fibers of the carbonized cotton cloth</b>                     | 4.4 (MoS <sub>2</sub> )                | 35         | 5.2                                       | 16               |
| <b>Nb<sub>2</sub>O<sub>5</sub>@3D holey-graphene framework composites</b>                                             | 6                                      | 10000      | 1                                         | 17               |

## References

1. Billaud J, Bouville F, Magrini T, Villevieille C, Studart AR. Magnetically aligned graphite electrodes for high-rate performance Li-ion batteries. *Nat. Energy* **1**, 16097 (2016).
2. Chen C, *et al.* Highly Conductive, lightweight, low-Tortuosity carbon frameworks as ultrathick 3D current collectors. *Adv. Energy Mater.* **7**, 1700595 (2017).
3. Yang K, *et al.* Constructing a highly efficient aligned conductive network to facilitate depolarized high-areal-capacity electrodes in Li-ion batteries. *Adv. Energy Mater.* **11**, 2100601 (2021).
4. Zhao Z, *et al.* Sandwich, vertical-channeled thick electrodes with high rate and cycle performance. *Adv. Funct. Mater.* **29**, 1809196 (2019).
5. Moyer K, Carter R, Hanken T, Douglas A, Oakes L, Pint CL. Electrophoretic deposition of LiFePO<sub>4</sub> onto 3-D current collectors for high areal loading battery cathodes. *Mater. Sci. Eng. B* **241**, 42-47 (2019).
6. Han X, *et al.* Scalable Engineering of bulk porous Si anodes for high initial efficiency and high-areal-capacity lithium-ion batteries. *ACS Appl. Mater. Interfaces* **11**, 714-721 (2019).
7. Elango R, Demortière A, De Andrade V, Morcrette M, Seznec V. Thick binder-free electrodes for Li-ion battery fabricated using templating approach and spark plasma sintering reveals high areal capacity. *Adv. Energy Mater.* **8**, 1703031 (2018).
8. Harks P-PRML, *et al.* Immersion precipitation route towards high performance thick and flexible electrodes for Li-ion batteries. *J. Power Sources* **441**, 227200 (2019).
9. Zhang S, *et al.* Ultrahigh areal capacity of self-combusted nanoporous NiCuMn/Cu flexible anode for Li-ion battery. *Chem. Eng. J.* **383**, 123097 (2020).
10. Zhang F, *et al.* 3D copper foam@FeO<sub>x</sub> nanoarrays as a high areal capacity and stable electrode for lithium-ion batteries. *ACS Appl. Energy Mater.* **1**, 5417-5427 (2018).
11. Li Y-F, *et al.* Carbon/binder-free NiO@NiO/NF with in situ formed interlayer for high-areal-capacity lithium storage. *Adv. Energy Mater.* **9**, 1803690 (2019).
12. Wang X, *et al.* High areal capacity Li ion battery anode based on thick mesoporous

Co<sub>3</sub>O<sub>4</sub> nanosheet networks. *Nano Energy* **5**, 91-96 (2014).

13. Zhou S, *et al.* Sub-thick electrodes with enhanced transport kinetics via in situ epitaxial heterogeneous interfaces for high areal-capacity lithium ion batteries. *Small* **17**, 2100778 (2021).

14. Yu X, *et al.* A dual-carbon-anchoring strategy to fabricate flexible LiMn<sub>2</sub>O<sub>4</sub> cathode for advanced lithium-ion batteries with high areal capacity. *Nano Energy* **67**, 104256 (2020).

15. Huang Y, *et al.* Adsorption energy engineering of nickel oxide hybrid nanosheets for high areal capacity flexible lithium-ion batteries. *Energy Storage Mater.* **25**, 41-51 (2020).

16. Shan X, Zhang S, Zhang N, Chen Y, Gao H, Zhang X. Synthesis and characterization of three-dimensional MoS<sub>2</sub>@carbon fibers hierarchical architecture with high capacity and high mass loading for Li-ion batteries. *J. Colloid Interface Sci.* **510**, 327-333 (2018).

17. Sun H, *et al.* Three-dimensional holey-graphene/niobia composite architectures for ultrahigh-rate energy storage. *Science* **356**, 599-604 (2017).
